# Supplementary material for: Integrative omics analysis. A study based on Plasmodium falciparum mRNA and protein data
Source: PubMed Central journal article supplement (PMC4101701; doi:10.1186/1752-0509-8-s2-s4), 2014-03-13
Supplement: 1752-0509-8-S2-S4-S1.pdf [file 1752-0509-8-S2-S4-S1.pdf]

PDF file containing the mapping between the numbers used in the CIA plots, GO terms and GO names.

Table 1: Mapping between GO terms, GO names and the numbers used in CIA.

| Number | GO term    | GO name                                                                      |
|--------|------------|------------------------------------------------------------------------------|
| 1      | GO:0009405 | pathogenesis                                                                 |
| 2      | GO:0016337 | cell-cell adhesion                                                           |
| 3      | GO:0020013 | modulation by symbiont of host erythrocyte aggregation                       |
| 4      | GO:0020033 | antigenic variation                                                          |
| 5      | GO:0020035 | cytoadherence to microvasculature, mediated by symbiont protein              |
| 6      | GO:0042000 | translocation of peptides or proteins into host                              |
| 7      | GO:0006457 | protein folding                                                              |
| 8      | GO:0050776 | regulation of immune response                                                |
| 9      | GO:0030260 | entry into host cell                                                         |
| 10     | GO:0006468 | protein phosphorylation                                                      |
| 11     | GO:0006412 | translation                                                                  |
| 12     | GO:0006418 | tRNA aminoacylation for protein translation                                  |
| 13     | GO:0006422 | aspartyl-tRNA aminoacylation                                                 |
| 14     | GO:0006887 | exocytosis                                                                   |
| 15     | GO:0015031 | protein transport                                                            |
| 16     | GO:0006508 | proteolysis                                                                  |
| 17     | GO:0006817 | phosphate ion transport                                                      |
| 18     | GO:0006810 | transport                                                                    |
| 19     | GO:0006511 | ubiquitin-dependent protein catabolic process                                |
| 20     | GO:0019288 | isopentenyl diphosphate biosynthetic process, mevalonate-independent pathway |
| 21     | GO:0055114 | oxidation-reduction process                                                  |
| 22     | GO:0055085 | transmembrane transport                                                      |
| 23     | GO:0007010 | cytoskeleton organization                                                    |
| 24     | GO:0006364 | rRNA processing                                                              |
| 25     | GO:0032259 | methylation                                                                  |
| 26     | GO:0007049 | cell cycle                                                                   |
| 27     | GO:0006139 | nucleobase-containing compound metabolic process                             |
| 28     | GO:0015986 | ATP synthesis coupled proton transport                                       |
| 29     | GO:0015991 | ATP hydrolysis coupled proton transport                                      |
| 30     | GO:0006754 | ATP biosynthetic process                                                     |
| 31     | GO:0006812 | cation transport                                                             |
| 32     | GO:0006816 | calcium ion transport                                                        |
| 33     | GO:0008152 | metabolic process                                                            |
| 34     | GO:0006413 | translational initiation                                                     |
| 35     | GO:0042254 | ribosome biogenesis                                                          |
| 36     | GO:0006184 | GTP catabolic process                                                        |
| 37     | GO:0006886 | intracellular protein transport                                              |
| 38     | GO:0006913 | nucleocytoplasmic transport                                                  |
| 39     | GO:0007165 | signal transduction                                                          |
| 40     | GO:0007264 | small GTPase mediated signal transduction                                    |
| 41     | GO:0060627 | regulation of vesicle-mediated transport                                     |
| 42     | GO:0008299 | isoprenoid biosynthetic process                                              |
| 43     | GO:0007067 | mitosis                                                                      |
| 44     | GO:0006414 | translational elongation                                                     |
| 45     | GO:0006281 | DNA repair                                                                   |
| 46     | GO:0006302 | double-strand break repair                                                   |

Continued on next page

Table 1 – continued from previous page

| Number | GO term    | GO name                                                    |
|--------|------------|------------------------------------------------------------|
| 47     | GO:0051603 | proteolysis involved in cellular protein catabolic process |
| 48     | GO:0006260 | DNA replication                                            |
| 49     | GO:0009408 | response to heat                                           |
| 50     | GO:0006461 | protein complex assembly                                   |
| 51     | GO:0007021 | tubulin complex assembly                                   |
| 52     | GO:0006474 | N-terminal protein amino acid acetylation                  |
| 53     | GO:0006355 | regulation of transcription, DNA-dependent                 |
| 54     | GO:0035556 | intracellular signal transduction                          |
| 55     | GO:0006432 | phenylalanyl-tRNA aminoacylation                           |
| 56     | GO:0043039 | tRNA aminoacylation                                        |
| 57     | GO:0008283 | cell proliferation                                         |
| 58     | GO:0006366 | transcription from RNA polymerase II promoter              |
| 59     | GO:0046488 | phosphatidylinositol metabolic process                     |
| 60     | GO:0048015 | phosphatidylinositol-mediated signaling                    |
| 61     | GO:0006334 | nucleosome assembly                                        |
| 62     | GO:0006367 | transcription initiation from RNA polymerase II promoter   |
| 63     | GO:0007018 | microtubule-based movement                                 |
| 64     | GO:0007155 | cell adhesion                                              |
| 65     | GO:0006221 | pyrimidine nucleotide biosynthetic process                 |
| 66     | GO:0006428 | isoleucyl-tRNA aminoacylation                              |
| 67     | GO:0006417 | regulation of translation                                  |
| 68     | GO:0006259 | DNA metabolic process                                      |
| 69     | GO:0019835 | cytolysis                                                  |
| 70     | GO:0019836 | hemolysis by symbiont of host erythrocytes                 |
| 71     | GO:0006464 | cellular protein modification process                      |
| 72     | GO:0016117 | carotenoid biosynthetic process                            |
| 73     | GO:0006289 | nucleotide-excision repair                                 |
| 74     | GO:0007017 | microtubule-based process                                  |
| 75     | GO:0006520 | cellular amino acid metabolic process                      |
| 76     | GO:0009058 | biosynthetic process                                       |
| 77     | GO:0006351 | transcription, DNA-dependent                               |
| 78     | GO:0006353 | DNA-dependent transcription, termination                   |
| 79     | GO:0006397 | mRNA processing                                            |
| 80     | GO:0008646 | high-affinity hexose transport                             |
| 81     | GO:0045426 | quinone cofactor biosynthetic process                      |
| 82     | GO:0044237 | cellular metabolic process                                 |
| 83     | GO:0042176 | regulation of protein catabolic process                    |
| 84     | GO:0009073 | aromatic amino acid family biosynthetic process            |
| 85     | GO:0006383 | transcription from RNA polymerase III promoter             |
| 86     | GO:0006163 | purine nucleotide metabolic process                        |
| 87     | GO:0006188 | IMP biosynthetic process                                   |
| 88     | GO:0009152 | purine ribonucleotide biosynthetic process                 |
| 89     | GO:0016255 | attachment of GPI anchor to protein                        |
| 90     | GO:0016226 | iron-sulfur cluster assembly                               |
| 91     | GO:0002377 | immunoglobulin production                                  |
| 92     | GO:0009790 | embryo development                                         |
| 93     | GO:0030216 | keratinocyte differentiation                               |
| 94     | GO:0006633 | fatty acid biosynthetic process                            |
| 95     | GO:0006629 | lipid metabolic process                                    |
| 96     | GO:0006396 | RNA processing                                             |

Continued on next page

Table 1 – continued from previous page

| Number | GO term    | GO name                                                        |
|--------|------------|----------------------------------------------------------------|
| 97     | GO:0016114 | terpenoid biosynthetic process                                 |
| 98     | GO:0006836 | neurotransmitter transport                                     |
| 99     | GO:0006605 | protein targeting                                              |
| 100    | GO:0043952 | protein transport by the Sec complex                           |
| 101    | GO:0015718 | monocarboxylic acid transport                                  |
| 102    | GO:0016192 | vesicle-mediated transport                                     |
| 103    | GO:0031338 | regulation of vesicle fusion                                   |
| 104    | GO:0032889 | regulation of vacuole fusion, non-autophagic                   |
| 105    | GO:0008610 | lipid biosynthetic process                                     |
| 106    | GO:0006421 | asparaginyl-tRNA aminoacylation                                |
| 107    | GO:0001522 | pseudouridine synthesis                                        |
| 108    | GO:0009451 | RNA modification                                               |
| 109    | GO:0006415 | translational termination                                      |
| 110    | GO:0006449 | regulation of translational termination                        |
| 111    | GO:0006855 | drug transmembrane transport                                   |
| 112    | GO:0030163 | protein catabolic process                                      |
| 113    | GO:0006986 | response to unfolded protein                                   |
| 114    | GO:0044267 | cellular protein metabolic process                             |
| 115    | GO:0006888 | ER to Golgi vesicle-mediated transport                         |
| 116    | GO:0044053 | translocation of peptides or proteins into host cell cytoplasm |
| 117    | GO:0044409 | entry into host                                                |
| 118    | GO:0006631 | fatty acid metabolic process                                   |
| 119    | GO:0015909 | long-chain fatty acid transport                                |
| 120    | GO:0006267 | pre-replicative complex assembly                               |
| 121    | GO:0006338 | chromatin remodeling                                           |
| 122    | GO:0006904 | vesicle docking involved in exocytosis                         |
| 123    | GO:0006869 | lipid transport                                                |
| 124    | GO:0006897 | endocytosis                                                    |
| 125    | GO:0008203 | cholesterol metabolic process                                  |
| 126    | GO:0015992 | proton transport                                               |
| 127    | GO:0046034 | ATP metabolic process                                          |
| 128    | GO:0006974 | response to DNA damage stimulus                                |
| 129    | GO:0000027 | ribosomal large subunit assembly                               |
| 130    | GO:0000375 | RNA splicing, via transesterification reactions                |
| 131    | GO:0008380 | RNA splicing                                                   |
| 132    | GO:0016042 | lipid catabolic process                                        |
| 133    | GO:0000398 | nuclear mRNA splicing, via spliceosome                         |
| 134    | GO:0000154 | rRNA modification                                              |
| 135    | GO:0000059 | protein import into nucleus, docking                           |
| 136    | GO:0018345 | protein palmitoylation                                         |
| 137    | GO:0000226 | microtubule cytoskeleton organization                          |
| 138    | GO:0006467 | protein thiol-disulfide exchange                               |
| 139    | GO:0045454 | cell redox homeostasis                                         |
| 140    | GO:0043687 | post-translational protein modification                        |
| 141    | GO:0051246 | regulation of protein metabolic process                        |
| 142    | GO:0017038 | protein import                                                 |
| 143    | GO:0065002 | intracellular protein transmembrane transport                  |
| 144    | GO:0006979 | response to oxidative stress                                   |
| 145    | GO:0006072 | glycerol-3-phosphate metabolic process                         |
| 146    | GO:0006127 | glycerophosphate shuttle                                       |

Continued on next page

Table 1 – continued from previous page

| Number | GO term    | GO name                                              |
|--------|------------|------------------------------------------------------|
| 147    | GO:0006950 | response to stress                                   |
| 148    | GO:0016567 | protein ubiquitination                               |
| 149    | GO:0006470 | protein dephosphorylation                            |
| 150    | GO:0016311 | dephosphorylation                                    |
| 151    | GO:0046823 | negative regulation of nucleocytoplasmic transport   |
| 152    | GO:0060284 | regulation of cell development                       |
| 153    | GO:0006529 | asparagine biosynthetic process                      |
| 154    | GO:0006438 | valyl-tRNA aminoacylation                            |
| 155    | GO:0006486 | protein glycosylation                                |
| 156    | GO:0006487 | protein N-linked glycosylation                       |
| 157    | GO:0018105 | peptidyl-serine phosphorylation                      |
| 158    | GO:0010564 | regulation of cell cycle process                     |
| 159    | GO:0030433 | ER-associated protein catabolic process              |
| 160    | GO:0032780 | negative regulation of ATPase activity               |
| 161    | GO:0051131 | chaperone-mediated protein complex assembly          |
| 162    | GO:0002312 | B cell activation involved in immune response        |
| 163    | GO:0006796 | phosphate-containing compound metabolic process      |
| 164    | GO:0051301 | cell division                                        |
| 165    | GO:0006378 | mRNA polyadenylation                                 |
| 166    | GO:0006379 | mRNA cleavage                                        |
| 167    | GO:0006096 | glycolysis                                           |
| 168    | GO:0015914 | phospholipid transport                               |
| 169    | GO:0009966 | regulation of signal transduction                    |
| 170    | GO:0043666 | regulation of phosphoprotein phosphatase activity    |
| 171    | GO:0006465 | signal peptide processing                            |
| 172    | GO:0006333 | chromatin assembly or disassembly                    |
| 173    | GO:0006488 | dolichol-linked oligosaccharide biosynthetic process |
| 174    | GO:0007275 | multicellular organismal development                 |
| 175    | GO:0006370 | 7-methylguanosine mRNA capping                       |
| 176    | GO:0019432 | triglyceride biosynthetic process                    |
| 177    | GO:0032313 | regulation of Rab GTPase activity                    |
| 178    | GO:0015908 | fatty acid transport                                 |
| 179    | GO:0016579 | protein deubiquitination                             |
| 180    | GO:0000245 | spliceosomal complex assembly                        |
| 181    | GO:0046907 | intracellular transport                              |
| 182    | GO:0016070 | RNA metabolic process                                |
| 183    | GO:0006554 | lysine catabolic process                             |
| 184    | GO:0007035 | vacuolar acidification                               |
| 185    | GO:0009438 | methylglyoxal metabolic process                      |
| 186    | GO:0006744 | ubiquinone biosynthetic process                      |
| 187    | GO:0009234 | menaquinone biosynthetic process                     |
| 188    | GO:0006354 | DNA-dependent transcription, elongation              |
| 189    | GO:0008295 | spermidine biosynthetic process                      |
| 190    | GO:0006261 | DNA-dependent DNA replication                        |
| 191    | GO:0051052 | regulation of DNA metabolic process                  |
| 192    | GO:0006400 | tRNA modification                                    |
| 193    | GO:0051276 | chromosome organization                              |
| 194    | GO:0015684 | ferrous iron transport                               |
| 195    | GO:0006606 | protein import into nucleus                          |
| 196    | GO:0006811 | ion transport                                        |

Continued on next page

Table 1 – continued from previous page

| Number | GO term    | GO name                                                                          |
|--------|------------|----------------------------------------------------------------------------------|
| 197    | GO:0006875 | cellular metal ion homeostasis                                                   |
| 198    | GO:0046685 | response to arsenic-containing substance                                         |
| 199    | GO:0046939 | nucleotide phosphorylation                                                       |
| 200    | GO:0006270 | DNA-dependent DNA replication initiation                                         |
| 201    | GO:0016568 | chromatin modification                                                           |
| 202    | GO:0016480 | negative regulation of transcription from RNA polymerase III promoter            |
| 203    | GO:0017148 | negative regulation of translation                                               |
| 204    | GO:0006231 | dTMP biosynthetic process                                                        |
| 205    | GO:0006545 | glycine biosynthetic process                                                     |
| 206    | GO:0006730 | one-carbon metabolic process                                                     |
| 207    | GO:0009165 | nucleotide biosynthetic process                                                  |
| 208    | GO:0043248 | proteasome assembly                                                              |
| 209    | GO:0006182 | cGMP biosynthetic process                                                        |
| 210    | GO:0018144 | RNA-protein covalent cross-linking                                               |
| 211    | GO:0009059 | macromolecule biosynthetic process                                               |
| 212    | GO:0051258 | protein polymerization                                                           |
| 213    | GO:0006446 | regulation of translational initiation                                           |
| 214    | GO:0006429 | leucyl-tRNA aminoacylation                                                       |
| 215    | GO:0006626 | protein targeting to mitochondrion                                               |
| 216    | GO:0045039 | protein import into mitochondrial inner membrane                                 |
| 217    | GO:0016310 | phosphorylation                                                                  |
| 218    | GO:0030036 | actin cytoskeleton organization                                                  |
| 219    | GO:0060327 | cytoplasmic actin-based contraction involved in cell motility                    |
| 220    | GO:0006099 | tricarboxylic acid cycle                                                         |
| 221    | GO:0008643 | carbohydrate transport                                                           |
| 222    | GO:0006298 | mismatch repair                                                                  |
| 223    | GO:0019941 | modification-dependent protein catabolic process                                 |
| 224    | GO:0042787 | protein ubiquitination involved in ubiquitin-dependent protein catabolic process |
| 225    | GO:0006437 | tyrosyl-tRNA aminoacylation                                                      |
| 226    | GO:0000122 | negative regulation of transcription from RNA polymerase II promoter             |
| 227    | GO:0030154 | cell differentiation                                                             |
| 228    | GO:0046323 | glucose import                                                                   |
| 229    | GO:0006323 | DNA packaging                                                                    |
| 230    | GO:0006360 | transcription from RNA polymerase I promoter                                     |
| 231    | GO:0006310 | DNA recombination                                                                |
| 232    | GO:0046854 | phosphatidylinositol phosphorylation                                             |
| 233    | GO:0006265 | DNA topological change                                                           |
| 234    | GO:0006021 | inositol biosynthetic process                                                    |
| 235    | GO:0008654 | phospholipid biosynthetic process                                                |
| 236    | GO:0006750 | glutathione biosynthetic process                                                 |
| 237    | GO:0009116 | nucleoside metabolic process                                                     |
| 238    | GO:0000917 | barrier septum assembly                                                          |
| 239    | GO:0009052 | pentose-phosphate shunt, non-oxidative branch                                    |
| 240    | GO:0008033 | tRNA processing                                                                  |
| 241    | GO:0015904 | tetracycline transport                                                           |
| 242    | GO:0046677 | response to antibiotic                                                           |
| 243    | GO:0009987 | cellular process                                                                 |
| 244    | GO:0051016 | barbed-end actin filament capping                                                |
| 245    | GO:0000079 | regulation of cyclin-dependent protein kinase activity                           |
| 246    | GO:0045736 | negative regulation of cyclin-dependent protein kinase activity                  |

Continued on next page

Table 1 – continued from previous page

| Number | GO term    | GO name                                                          |
|--------|------------|------------------------------------------------------------------|
| 247    | GO:0051726 | regulation of cell cycle                                         |
| 248    | GO:0043487 | regulation of RNA stability                                      |
| 249    | GO:0006818 | hydrogen transport                                               |
| 250    | GO:0048034 | heme O biosynthetic process                                      |
| 251    | GO:0009228 | thiamine biosynthetic process                                    |
| 252    | GO:0008104 | protein localization                                             |
| 253    | GO:0042493 | response to drug                                                 |
| 254    | GO:0007186 | G-protein coupled receptor signaling pathway                     |
| 255    | GO:0006607 | NLS-bearing substrate import into nucleus                        |
| 256    | GO:0006777 | Mo-molybdopterin cofactor biosynthetic process                   |
| 257    | GO:0032312 | regulation of ARF GTPase activity                                |
| 258    | GO:0043087 | regulation of GTPase activity                                    |
| 259    | GO:0009245 | lipid A biosynthetic process                                     |
| 260    | GO:0007169 | transmembrane receptor protein tyrosine kinase signaling pathway |
| 261    | GO:0016043 | cellular component organization                                  |
| 262    | GO:0018344 | protein geranylgeranylation                                      |
| 263    | GO:0006207 | 'de novo' pyrimidine nucleobase biosynthetic process             |
| 264    | GO:0006222 | UMP biosynthetic process                                         |
| 265    | GO:0051302 | regulation of cell division                                      |
| 266    | GO:0006165 | nucleoside diphosphate phosphorylation                           |
| 267    | GO:0006183 | GTP biosynthetic process                                         |
| 268    | GO:0006228 | UTP biosynthetic process                                         |
| 269    | GO:0006241 | CTP biosynthetic process                                         |
| 270    | GO:0019368 | fatty acid elongation, unsaturated fatty acid                    |
| 271    | GO:0006779 | porphyrin-containing compound biosynthetic process               |
| 272    | GO:0006783 | heme biosynthetic process                                        |
| 273    | GO:0006743 | ubiquinone metabolic process                                     |
| 274    | GO:0006591 | ornithine metabolic process                                      |
| 275    | GO:0030001 | metal ion transport                                              |
| 276    | GO:0044262 | cellular carbohydrate metabolic process                          |
| 277    | GO:0006098 | pentose-phosphate shunt                                          |
| 278    | GO:0006357 | regulation of transcription from RNA polymerase II promoter      |
| 279    | GO:0034227 | tRNA thio-modification                                           |
| 280    | GO:0009306 | protein secretion                                                |
| 281    | GO:0006284 | base-excision repair                                             |
| 282    | GO:0006506 | GPI anchor biosynthetic process                                  |
| 283    | GO:0000304 | response to singlet oxygen                                       |
| 284    | GO:0008614 | pyridoxine metabolic process                                     |
| 285    | GO:0042819 | vitamin B6 biosynthetic process                                  |
| 286    | GO:0048870 | cell motility                                                    |
| 287    | GO:0006090 | pyruvate metabolic process                                       |
| 288    | GO:0006820 | anion transport                                                  |
| 289    | GO:0044070 | regulation of anion transport                                    |
| 290    | GO:0042128 | nitrate assimilation                                             |
| 291    | GO:0005975 | carbohydrate metabolic process                                   |
| 292    | GO:0009432 | SOS response                                                     |
| 293    | GO:0006097 | glyoxylate cycle                                                 |
| 294    | GO:0006352 | DNA-dependent transcription, initiation                          |
| 295    | GO:0008615 | pyridoxine biosynthetic process                                  |
| 296    | GO:0042823 | pyridoxal phosphate biosynthetic process                         |

Continued on next page

Table 1 – continued from previous page

| Number | GO term    | GO name                                                     |
|--------|------------|-------------------------------------------------------------|
| 297    | GO:0043412 | macromolecule modification                                  |
| 298    | GO:0007034 | vacuolar transport                                          |
| 299    | GO:0042144 | vacuole fusion, non-autophagic                              |
| 300    | GO:0006122 | mitochondrial electron transport, ubiquinol to cytochrome c |
| 301    | GO:0045836 | positive regulation of meiosis                              |
| 302    | GO:0006801 | superoxide metabolic process                                |
| 303    | GO:0019430 | removal of superoxide radicals                              |
| 304    | GO:0006401 | RNA catabolic process                                       |
| 305    | GO:0031123 | RNA 3'-end processing                                       |
| 306    | GO:0043631 | RNA polyadenylation                                         |
| 307    | GO:0051289 | protein homotetramerization                                 |
| 308    | GO:0006091 | generation of precursor metabolites and energy              |
| 309    | GO:0001682 | tRNA 5'-leader removal                                      |
| 310    | GO:0006729 | tetrahydrobiopterin biosynthetic process                    |
| 311    | GO:0006424 | glutamyl-tRNA aminoacylation                                |
| 312    | GO:0009435 | NAD biosynthetic process                                    |
| 313    | GO:0019357 | nicotinate nucleotide biosynthetic process                  |
| 314    | GO:0019358 | nicotinate nucleotide salvage                               |
| 315    | GO:0006865 | amino acid transport                                        |
| 316    | GO:0000082 | G1/S transition of mitotic cell cycle                       |
| 317    | GO:0000105 | histidine biosynthetic process                              |
| 318    | GO:0006164 | purine nucleotide biosynthetic process                      |
| 319    | GO:0009086 | methionine biosynthetic process                             |
| 320    | GO:0009396 | folic acid-containing compound biosynthetic process         |
| 321    | GO:0010501 | RNA secondary structure unwinding                           |
| 322    | GO:0032508 | DNA duplex unwinding                                        |
| 323    | GO:0006814 | sodium ion transport                                        |
| 324    | GO:0006644 | phospholipid metabolic process                              |
| 325    | GO:0007154 | cell communication                                          |
| 326    | GO:0015937 | coenzyme A biosynthetic process                             |
| 327    | GO:0045173 | O-sialoglycoprotein catabolic process                       |
| 328    | GO:0006825 | copper ion transport                                        |
| 329    | GO:0006878 | cellular copper ion homeostasis                             |
| 330    | GO:0008535 | respiratory chain complex IV assembly                       |
| 331    | GO:0030261 | chromosome condensation                                     |
| 332    | GO:0006829 | zinc ion transport                                          |
| 333    | GO:0006534 | cysteine metabolic process                                  |
| 334    | GO:0008616 | queuosine biosynthetic process                              |
| 335    | GO:0006434 | seryl-tRNA aminoacylation                                   |
| 336    | GO:0030522 | intracellular receptor mediated signaling pathway           |
| 337    | GO:0006458 | 'de novo' protein folding                                   |
| 338    | GO:0000280 | nuclear division                                            |
| 339    | GO:0042779 | tRNA 3'-trailer cleavage                                    |
| 340    | GO:0051028 | mRNA transport                                              |
| 341    | GO:0009607 | response to biotic stimulus                                 |
| 342    | GO:0042113 | B cell activation                                           |
| 343    | GO:0007530 | sex determination                                           |
| 344    | GO:0006306 | DNA methylation                                             |
| 345    | GO:0006614 | SRP-dependent cotranslational protein targeting to membrane |
| 346    | GO:0045900 | negative regulation of translational elongation             |

Continued on next page

Table 1 – continued from previous page

| Number | GO term    | GO name                                                                  |
|--------|------------|--------------------------------------------------------------------------|
| 347    | GO:0000256 | allantoin catabolic process                                              |
| 348    | GO:0006144 | purine nucleobase metabolic process                                      |
| 349    | GO:0000055 | ribosomal large subunit export from nucleus                              |
| 350    | GO:0042273 | ribosomal large subunit biogenesis                                       |
| 351    | GO:0006536 | glutamate metabolic process                                              |
| 352    | GO:0009190 | cyclic nucleotide biosynthetic process                                   |
| 353    | GO:0000724 | double-strand break repair via homologous recombination                  |
| 354    | GO:0030259 | lipid glycosylation                                                      |
| 355    | GO:0006890 | retrograde vesicle-mediated transport, Golgi to ER                       |
| 356    | GO:0006761 | dihydrofolate biosynthetic process                                       |
| 357    | GO:0042558 | pteridine-containing compound metabolic process                          |
| 358    | GO:0006004 | fucose metabolic process                                                 |
| 359    | GO:0019673 | GDP-mannose metabolic process                                            |
| 360    | GO:0006086 | acetyl-CoA biosynthetic process from pyruvate                            |
| 361    | GO:0019538 | protein metabolic process                                                |
| 362    | GO:0007131 | reciprocal meiotic recombination                                         |
| 363    | GO:0002720 | positive regulation of cytokine production involved in immune response   |
| 364    | GO:0006359 | regulation of transcription from RNA polymerase III promoter             |
| 365    | GO:0006655 | phosphatidylglycerol biosynthetic process                                |
| 366    | GO:0006103 | 2-oxoglutarate metabolic process                                         |
| 367    | GO:0009107 | lipoate biosynthetic process                                             |
| 368    | GO:0006835 | dicarboxylic acid transport                                              |
| 369    | GO:0006839 | mitochondrial transport                                                  |
| 370    | GO:0015742 | alpha-ketoglutarate transport                                            |
| 371    | GO:0015743 | malate transport                                                         |
| 372    | GO:0015858 | nucleoside transport                                                     |
| 373    | GO:0007059 | chromosome segregation                                                   |
| 374    | GO:0051205 | protein insertion into membrane                                          |
| 375    | GO:0042127 | regulation of cell proliferation                                         |
| 376    | GO:0051262 | protein tetramerization                                                  |
| 377    | GO:0006525 | arginine metabolic process                                               |
| 378    | GO:0031365 | N-terminal protein amino acid modification                               |
| 379    | GO:0043686 | co-translational protein modification                                    |
| 380    | GO:0006308 | DNA catabolic process                                                    |
| 381    | GO:0031167 | rRNA methylation                                                         |
| 382    | GO:0007219 | Notch signaling pathway                                                  |
| 383    | GO:0018342 | protein prenylation                                                      |
| 384    | GO:0006269 | DNA replication, synthesis of RNA primer                                 |
| 385    | GO:0006420 | arginyl-tRNA aminoacylation                                              |
| 386    | GO:0046836 | glycolipid transport                                                     |
| 387    | GO:0018279 | protein N-linked glycosylation via asparagine                            |
| 388    | GO:0006556 | S-adenosylmethionine biosynthetic process                                |
| 389    | GO:0006541 | glutamine metabolic process                                              |
| 390    | GO:0008153 | para-aminobenzoic acid biosynthetic process                              |
| 391    | GO:0006542 | glutamine biosynthetic process                                           |
| 392    | GO:0006807 | nitrogen compound metabolic process                                      |
| 393    | GO:0006772 | thiamine metabolic process                                               |
| 394    | GO:0009229 | thiamine diphosphate biosynthetic process                                |
| 395    | GO:0016575 | histone deacetylation                                                    |
| 396    | GO:0007205 | protein kinase C-activating G-protein coupled receptor signaling pathway |

Continued on next page



Table 1 – continued from previous page

| Number | GO term    | GO name                                                             |
|--------|------------|---------------------------------------------------------------------|
| 397    | GO:0007020 | microtubule nucleation                                              |
| 398    | GO:0015074 | DNA integration                                                     |
| 399    | GO:0032196 | transposition                                                       |
| 400    | GO:0006427 | histidyl-tRNA aminoacylation                                        |
| 401    | GO:0006431 | methionyl-tRNA aminoacylation                                       |
| 402    | GO:0000184 | nuclear-transcribed mRNA catabolic process, nonsense-mediated decay |
| 403    | GO:0007266 | Rho protein signal transduction                                     |
| 404    | GO:0017183 | peptidyl-diphthamide biosynthetic process from peptidyl-histidine   |
| 405    | GO:0006493 | protein O-linked glycosylation                                      |
| 406    | GO:0006665 | sphingolipid metabolic process                                      |
| 407    | GO:0043161 | proteasomal ubiquitin-dependent protein catabolic process           |
| 408    | GO:0006788 | heme oxidation                                                      |
| 409    | GO:0006166 | purine ribonucleoside salvage                                       |
| 410    | GO:0006177 | GMP biosynthetic process                                            |
| 411    | GO:0006914 | autophagy                                                           |
| 412    | GO:0009225 | nucleotide-sugar metabolic process                                  |
| 413    | GO:0006423 | cysteinyl-tRNA aminoacylation                                       |
| 414    | GO:0042026 | protein refolding                                                   |
| 415    | GO:0009186 | deoxyribonucleoside diphosphate metabolic process                   |
| 416    | GO:0000045 | autophagic vacuole assembly                                         |
| 417    | GO:0002253 | activation of immune response                                       |
| 418    | GO:0006094 | gluconeogenesis                                                     |
| 419    | GO:0007030 | Golgi organization                                                  |
| 420    | GO:0009298 | GDP-mannose biosynthetic process                                    |
| 421    | GO:0019307 | mannose biosynthetic process                                        |
| 422    | GO:0006471 | protein ADP-ribosylation                                            |
| 423    | GO:0009264 | deoxyribonucleotide catabolic process                               |
| 424    | GO:0042773 | ATP synthesis coupled electron transport                            |
| 425    | GO:0006101 | citrate metabolic process                                           |
| 426    | GO:0006041 | glucosamine metabolic process                                       |
| 427    | GO:0016051 | carbohydrate biosynthetic process                                   |
| 428    | GO:0019353 | protoporphyrinogen IX biosynthetic process from glutamate           |
| 429    | GO:0009168 | purine ribonucleoside monophosphate biosynthetic process            |
| 430    | GO:0045893 | positive regulation of transcription, DNA-dependent                 |
| 431    | GO:0006596 | polyamine biosynthetic process                                      |
| 432    | GO:0006597 | spermine biosynthetic process                                       |
| 433    | GO:0009445 | putrescine metabolic process                                        |
| 434    | GO:0022900 | electron transport chain                                            |
| 435    | GO:0006898 | receptor-mediated endocytosis                                       |
| 436    | GO:0007276 | gamete generation                                                   |
| 437    | GO:0022904 | respiratory electron transport chain                                |
| 438    | GO:0016539 | intein-mediated protein splicing                                    |
| 439    | GO:0019478 | D-amino acid catabolic process                                      |
| 440    | GO:0046777 | protein autophosphorylation                                         |
| 441    | GO:0006104 | succinyl-CoA metabolic process                                      |
| 442    | GO:0042147 | retrograde transport, endosome to Golgi                             |
| 443    | GO:0006271 | DNA strand elongation involved in DNA replication                   |
| 444    | GO:0015785 | UDP-galactose transport                                             |
| 445    | GO:0000165 | MAPK cascade                                                        |
| 446    | GO:0046168 | glycerol-3-phosphate catabolic process                              |

Continued on next page

Table 1 – continued from previous page

| Number | GO term    | GO name                                                                                  |
|--------|------------|------------------------------------------------------------------------------------------|
| 447    | GO:0042540 | hemoglobin catabolic process                                                             |
| 448    | GO:0034214 | protein hexamerization                                                                   |
| 449    | GO:0000338 | protein deneddylation                                                                    |
| 450    | GO:0006405 | RNA export from nucleus                                                                  |
| 451    | GO:0007076 | mitotic chromosome condensation                                                          |
| 452    | GO:0006646 | phosphatidylethanolamine biosynthetic process                                            |
| 453    | GO:0006656 | phosphatidylcholine biosynthetic process                                                 |
| 454    | GO:0030150 | protein import into mitochondrial matrix                                                 |
| 455    | GO:0006435 | threonyl-tRNA aminoacylation                                                             |
| 456    | GO:0006399 | tRNA metabolic process                                                                   |
| 457    | GO:0046080 | dUTP metabolic process                                                                   |
| 458    | GO:0000070 | mitotic sister chromatid segregation                                                     |
| 459    | GO:0008202 | steroid metabolic process                                                                |
| 460    | GO:0006833 | water transport                                                                          |
| 461    | GO:0009247 | glycolipid biosynthetic process                                                          |
| 462    | GO:0015791 | polyol transport                                                                         |
| 463    | GO:0051475 | glucosylglycerol transport                                                               |
| 464    | GO:0006546 | glycine catabolic process                                                                |
| 465    | GO:0006813 | potassium ion transport                                                                  |
| 466    | GO:0006505 | GPI anchor metabolic process                                                             |
| 467    | GO:0051604 | protein maturation                                                                       |
| 468    | GO:0030048 | actin filament-based movement                                                            |
| 469    | GO:0042777 | plasma membrane ATP synthesis coupled proton transport                                   |
| 470    | GO:0000902 | cell morphogenesis                                                                       |
| 471    | GO:0008360 | regulation of cell shape                                                                 |
| 472    | GO:0009103 | lipopolysaccharide biosynthetic process                                                  |
| 473    | GO:0009252 | peptidoglycan biosynthetic process                                                       |
| 474    | GO:0006891 | intra-Golgi vesicle-mediated transport                                                   |
| 475    | GO:0010468 | regulation of gene expression                                                            |
| 476    | GO:0018343 | protein farnesylation                                                                    |
| 477    | GO:0042776 | mitochondrial ATP synthesis coupled proton transport                                     |
| 478    | GO:0001510 | RNA methylation                                                                          |
| 479    | GO:0009452 | 7-methylguanosine RNA capping                                                            |
| 480    | GO:0001819 | positive regulation of cytokine production                                               |
| 481    | GO:0006452 | translational frameshifting                                                              |
| 482    | GO:0008612 | peptidyl-lysine modification to hypusine                                                 |
| 483    | GO:0045901 | positive regulation of translational elongation                                          |
| 484    | GO:0045905 | positive regulation of translational termination                                         |
| 485    | GO:0009117 | nucleotide metabolic process                                                             |
| 486    | GO:0046069 | cGMP catabolic process                                                                   |
| 487    | GO:0033014 | tetrapyrrole biosynthetic process                                                        |
| 488    | GO:0006433 | prolyl-tRNA aminoacylation                                                               |
| 489    | GO:0005978 | glycogen biosynthetic process                                                            |
| 490    | GO:0006108 | malate metabolic process                                                                 |
| 491    | GO:0006617 | SRP-dependent cotranslational protein targeting to membrane, signal sequence recognition |
| 492    | GO:0006268 | DNA unwinding involved in replication                                                    |
| 493    | GO:0030071 | regulation of mitotic metaphase/anaphase transition                                      |
| 494    | GO:0015717 | triose phosphate transport                                                               |
| 495    | GO:0000910 | cytokinesis                                                                              |
| 496    | GO:0001932 | regulation of protein phosphorylation                                                    |

Continued on next page

Table 1 – continued from previous page

| Number | GO term    | GO name                                                     |
|--------|------------|-------------------------------------------------------------|
| 497    | GO:0006406 | mRNA export from nucleus                                    |
| 498    | GO:0006611 | protein export from nucleus                                 |
| 499    | GO:0006998 | nuclear envelope organization                               |
| 500    | GO:0015917 | aminophospholipid transport                                 |
| 501    | GO:0046654 | tetrahydrofolate biosynthetic process                       |
| 502    | GO:0016458 | gene silencing                                              |
| 503    | GO:0018063 | cytochrome c-heme linkage                                   |
| 504    | GO:0006275 | regulation of DNA replication                               |
| 505    | GO:0051259 | protein oligomerization                                     |
| 506    | GO:0018055 | peptidyl-lysine lipoylation                                 |
| 507    | GO:0020012 | evasion or tolerance of host immune response                |
| 508    | GO:0007015 | actin filament organization                                 |
| 509    | GO:0006544 | glycine metabolic process                                   |
| 510    | GO:0006563 | L-serine metabolic process                                  |
| 511    | GO:0006481 | C-terminal protein methylation                              |
| 512    | GO:0032513 | negative regulation of protein phosphatase type 2B activity |
| 513    | GO:0006388 | tRNA splicing, via endonucleolytic cleavage and ligation    |
| 514    | GO:0010038 | response to metal ion                                       |
| 515    | GO:0006928 | cellular component movement                                 |
| 516    | GO:0006233 | dTDP biosynthetic process                                   |
| 517    | GO:0006235 | dTTP biosynthetic process                                   |
| 518    | GO:0006436 | tryptophanyl-tRNA aminoacylation                            |
| 519    | GO:0006032 | chitin catabolic process                                    |
| 520    | GO:0000278 | mitotic cell cycle                                          |
| 521    | GO:0006266 | DNA ligation                                                |
| 522    | GO:0006273 | lagging strand elongation                                   |
| 523    | GO:0006402 | mRNA catabolic process                                      |
| 524    | GO:0006538 | glutamate catabolic process                                 |
| 525    | GO:0001906 | cell killing                                                |
| 526    | GO:0031120 | snRNA pseudouridine synthesis                               |
| 527    | GO:0006278 | RNA-dependent DNA replication                               |
| 528    | GO:0009249 | protein lipoylation                                         |
| 529    | GO:0006661 | phosphatidylinositol biosynthetic process                   |
| 530    | GO:0030488 | tRNA methylation                                            |
| 531    | GO:0051298 | centrosome duplication                                      |
| 532    | GO:0045017 | glycerolipid biosynthetic process                           |
| 533    | GO:0045047 | protein targeting to ER                                     |
| 534    | GO:0009056 | catabolic process                                           |
| 535    | GO:0006089 | lactate metabolic process                                   |
| 536    | GO:0000162 | tryptophan biosynthetic process                             |
| 537    | GO:0006342 | chromatin silencing                                         |
| 538    | GO:0006476 | protein deacetylation                                       |
| 539    | GO:0016233 | telomere capping                                            |
| 540    | GO:0006196 | AMP catabolic process                                       |
| 541    | GO:0006621 | protein retention in ER lumen                               |
| 542    | GO:0006425 | glutaminyl-tRNA aminoacylation                              |
| 543    | GO:0006304 | DNA modification                                            |
| 544    | GO:0042256 | mature ribosome assembly                                    |
| 545    | GO:0007600 | sensory perception                                          |
| 546    | GO:0017006 | protein-tetrapyrrole linkage                                |

Continued on next page

Table 1 – continued from previous page

| Number | GO term    | GO name                                                   |
|--------|------------|-----------------------------------------------------------|
| 547    | GO:0018106 | peptidyl-histidine phosphorylation                        |
| 548    | GO:0018298 | protein-chromophore linkage                               |
| 549    | GO:0050896 | response to stimulus                                      |
| 550    | GO:0006447 | regulation of translational initiation by iron            |
| 551    | GO:0000076 | DNA replication checkpoint                                |
| 552    | GO:0007090 | regulation of S phase of mitotic cell cycle               |
| 553    | GO:0006047 | UDP-N-acetylglucosamine metabolic process                 |
| 554    | GO:0016925 | protein sumoylation                                       |
| 555    | GO:0006102 | isocitrate metabolic process                              |
| 556    | GO:0006863 | purine nucleobase transport                               |
| 557    | GO:0032238 | adenosine transport                                       |
| 558    | GO:0006430 | lysyl-tRNA aminoacylation                                 |
| 559    | GO:0006071 | glycerol metabolic process                                |
| 560    | GO:0006167 | AMP biosynthetic process                                  |
| 561    | GO:0006915 | apoptotic process                                         |
| 562    | GO:0006561 | proline biosynthetic process                              |
| 563    | GO:0008154 | actin polymerization or depolymerization                  |
| 564    | GO:0006659 | phosphatidylserine biosynthetic process                   |
| 565    | GO:0006419 | alanyl-tRNA aminoacylation                                |
| 566    | GO:0006797 | polyphosphate metabolic process                           |
| 567    | GO:0031119 | tRNA pseudouridine synthesis                              |
| 568    | GO:0006171 | cAMP biosynthetic process                                 |
| 569    | GO:0006314 | intron homing                                             |
| 570    | GO:0016574 | histone ubiquitination                                    |
| 571    | GO:0006206 | pyrimidine nucleobase metabolic process                   |
| 572    | GO:0045727 | positive regulation of translation                        |
| 573    | GO:0006479 | protein methylation                                       |
| 574    | GO:0050983 | deoxyhypusine biosynthetic process from spermidine        |
| 575    | GO:0006499 | N-terminal protein myristoylation                         |
| 576    | GO:0016049 | cell growth                                               |
| 577    | GO:0006426 | glycyl-tRNA aminoacylation                                |
| 578    | GO:0035434 | copper ion transmembrane transport                        |
| 579    | GO:0006635 | fatty acid beta-oxidation                                 |
| 580    | GO:0009062 | fatty acid catabolic process                              |
| 581    | GO:0016571 | histone methylation                                       |
| 582    | GO:0015977 | carbon fixation                                           |
| 583    | GO:0007050 | cell cycle arrest                                         |
| 584    | GO:0030833 | regulation of actin filament polymerization               |
| 585    | GO:0030091 | protein repair                                            |
| 586    | GO:0006537 | glutamate biosynthetic process                            |
| 587    | GO:0006576 | cellular biogenic amine metabolic process                 |
| 588    | GO:0042262 | DNA protection                                            |
| 589    | GO:0006944 | cellular membrane fusion                                  |
| 590    | GO:0032012 | regulation of ARF protein signal transduction             |
| 591    | GO:0010608 | posttranscriptional regulation of gene expression         |
| 592    | GO:0042594 | response to starvation                                    |
| 593    | GO:0045595 | regulation of cell differentiation                        |
| 594    | GO:0042167 | heme catabolic process                                    |
| 595    | GO:0006384 | transcription initiation from RNA polymerase III promoter |
| 596    | GO:0048193 | Golgi vesicle transport                                   |

Continued on next page

Table 1 – continued from previous page

| Number | GO term    | GO name                                                                |
|--------|------------|------------------------------------------------------------------------|
| 597    | GO:0006006 | glucose metabolic process                                              |
| 598    | GO:0051156 | glucose 6-phosphate metabolic process                                  |
| 599    | GO:0006879 | cellular iron ion homeostasis                                          |
| 600    | GO:0006885 | regulation of pH                                                       |
| 601    | GO:0006662 | glycerol ether metabolic process                                       |
| 602    | GO:0002474 | antigen processing and presentation of peptide antigen via MHC class I |
| 603    | GO:0006955 | immune response                                                        |
| 604    | GO:0031952 | regulation of protein autophosphorylation                              |
| 605    | GO:0045737 | positive regulation of cyclin-dependent protein kinase activity        |
| 606    | GO:0042255 | ribosome assembly                                                      |
| 607    | GO:0009187 | cyclic nucleotide metabolic process                                    |
| 608    | GO:0008272 | sulfate transport                                                      |
| 609    | GO:0019932 | second-messenger-mediated signaling                                    |
| 610    | GO:0033205 | cell cycle cytokinesis                                                 |
| 611    | GO:0006325 | chromatin organization                                                 |
| 612    | GO:0019856 | pyrimidine nucleobase biosynthetic process                             |
| 613    | GO:0030497 | fatty acid elongation                                                  |
| 614    | GO:0009060 | aerobic respiration                                                    |
